# Supplementary material for: Sensory Neuron-Derived Eph Regulates Glomerular Arbors and Modulatory Function of a Central Serotonergic Neuron
Source: PubMed Central journal article supplement (PMC3630106; doi:10.1371/journal.pgen.1003452), 2013-04-18
Supplement: pgen.1003452.s005.pdf [file pgen.1003452.s005.pdf]

**Table1. Quantification of the axonal branch tip number of CSDn in different glomeruli.**

|                        | wild type     | <i>Eph</i> <sup>K632</sup> | <i>Ephrin</i> <sup>KG09118</sup> | UAS <i>Ephrin</i> | UAS <i>Ephrin</i> ;<br><i>Ephrin</i> <sup>KG09118</sup> | UAS <i>Eph</i> |
|------------------------|---------------|----------------------------|----------------------------------|-------------------|---------------------------------------------------------|----------------|
| <b><i>VAl1/m</i></b> * | 6.69±1.17(13) | 0.25±0.25(4)               | 24.4±3.66(5)                     | 2.5±2.48(8)       | 6.5±2.43(6)                                             | 19±5.96(5)     |
| <i>VAl1d</i>           | 48.33±7.8(6)  | 1.25±0.95(4)               | 49.2±4(5)                        | 15.5±6.08(8)      | 17.0±5.62(6)                                            | 0.0±0.45(5)    |
| <b><i>DA1</i></b> *    | 11.46±0.7(13) | 1.75±1.75(4)               | 41.4±7.81(5)                     | 4.0±3.25(8)       | 11.0±3.02(6)                                            | 32.0±6.18(5)   |
| <b><i>DL3</i></b> *    | 2.69±0.35(13) | 1.0±0.41(4)                | 9.89±0.72(9)                     | 2.5±1.67(8)       | 2.5±1.05(6)                                             | 12.0±3.03(5)   |
| <i>V</i>               | 34.83±3.41(6) | 8.75±1.5(4)                | 28.0±4.42(4)                     | 25.0±5.17(5)      | 21.0±4.8(5)                                             | 10.0±2.58(4)   |

\* Glomerulus in bold express high levels of Eph during development.

All the above mentioned genotypes in the table have *RN2flp, tub>CD2>Gal4, UASmCD8::GFP* in the background. Data is represented as mean±SEM(n).
